1 **Title page**

2 **Full Title:** PROgressive struCturEd Simulation-based Surgical training program (PROCESS) - Open Vascular  
3 Surgery: Study protocol for triple-arm, randomized, single-blinded educational clinical trial.

4 **Short Title:** PROgressive struCturEd Simulation-based Surgical training program (PROCESS) - Open Vascular  
5 Surgery: A Protocol.

6  
7 **Authors names:** Alejandro Velandia-Sánchez MD<sup>1,2</sup>, Camilo A. Polanía-Sandoval MD<sup>1</sup>, José V. Álvarez-Martínez<sup>1,4</sup>,  
8 Santiago Uribe-Ramírez<sup>1,4</sup>, Juliana Tello-Pirateque<sup>1,4</sup>, Carlos J. Pérez-Rivera MD, MSc<sup>1,3</sup>, Juan P. Ávila-Madrigal  
9 MD<sup>2</sup>, Danna L. Cruz Reyes MSc, PhD<sup>4</sup>, Paulo A. Cabrera-Rivera MD, MSc<sup>3</sup>, Camilo E. Pérez-Cualtan MSc<sup>5</sup>, Edgar  
10 C. Barrera MD, MSc<sup>4</sup>, Yury F. Bustos-Martínez MD<sup>4</sup>, Sebastián Gómez Galán MD<sup>1</sup>, Juan C. Briceño MSc, PhD<sup>5</sup>,  
11 Michel M.P.J. Reijnen MD, PhD<sup>6,7</sup>, Jaime Camacho-Mackenzie MD<sup>1,4</sup>, Carlos O. Mendivil MD, MSc, PhD<sup>2,8</sup>, Juan  
12 G. Barrera-Carvajal MD<sup>1,4</sup>.

13 **Affiliations:**

- 14 1. Vascular and Endovascular Surgery Research Group, Fundación Cardioinfantil – Instituto de Cardiología,  
15 Bogotá, Colombia.
- 16 2. School of Medicine, Universidad de Los Andes, Bogotá, Colombia.
- 17 3. General Surgery Research Group, Fundación Cardioinfantil – Instituto de Cardiología, Bogotá, Colombia.
- 18 4. Universidad del Rosario, School of Medicine and Health Sciences, Bogotá, Colombia.
- 19 5. Department of Biomedical Engineering, Universidad de Los Andes, Bogotá, Colombia.
- 20 6. Department of Surgery, Rijnstate, Arnhem, The Netherlands.
- 21 7. Multi-Modality Medical Imaging Group, University of Twente, Enschede, The Netherlands.
- 22 8. Section of Endocrinology, Department of Internal Medicine, Hospital Universitario Fundación Santa Fe de  
23 Bogotá, Bogotá, Colombia

24  
25 **Corresponding author:** Alejandro Velandia-Sánchez

26 Address for correspondence: Cra 13B No. 161-85 Torre I Piso 8, Bogotá, Colombia. Postal code: 110131

27 Telephone: 6672727 extensions 79851 and 78850

28 E-mail: [c.velandiasanchez@uniandes.edu.co](mailto:c.velandiasanchez@uniandes.edu.co)

29 **Abstract**

30 **Introduction:** Vascular surgery has been directed towards endovascular approaches; however, not all patients qualify  
31 for these procedures. Open vascular surgery remains crucial, demanding a steep learning curve. Exposure to these  
32 procedures has declined, resulting in a need for more standardization in acquiring open vascular surgery skills and  
33 potentially contributing to poorer outcomes. Simulation offers a solution, yet the evidence for structured programs in  
34 open vascular surgery is limited. This study aims to compare the efficacy of technical skill acquisition between a  
35 structured, progressive simulation-based training program and traditional experience-based training in open vascular  
36 surgery.

37 **Methods:** A randomized, single-blinded, triple-arm educational clinical trial will be conducted. A control and  
38 intervention phases of three groups with different exposure levels to the simulation program are proposed. Group 1:  
39 open abdominal aortic repair, Group 2: vascular anastomosis and open abdominal aortic repair, and Group 3: specific  
40 surgical skills, vascular anastomosis, and open abdominal aortic repair. The 3D-printed models from AngioCT will  
41 be used for the open abdominal aortic repair simulation. Surgical residents of general, vascular, or cardiothoracic  
42 surgery programs will be included. Sample size calculation resulted in 45 participants, 15 per group. Single blinding  
43 will involve external evaluators. Randomization will occur as a stratified randomization.

44 **Discussion:** We expect that the structured and progressive simulation-based training program would enhance technical  
45 surgical skills. Based on the progression through different modules within the program, we aim to evaluate differences  
46 in the acquisition of technical surgical skills. We hypothesize that 3D-printed patient-specific models can enhance  
47 participants' vascular surgery training and provide optimal simulated scenarios while prioritizing patient safety. We  
48 hope this initiative will impact the formation of future vascular surgeons, shape future training programs, and ensure  
49 comprehensive preparation for open vascular surgery.

50 **Trial registration:** This study protocol was registered in [clinicaltrials.gov](https://clinicaltrials.gov) with the NCT-ID: NCT06452901.

51

52 **Keywords:** Open vascular surgery, Abdominal aortic aneurysm open repair, Competency-based education,  
53 Simulation training.

54

55

56

57 **Manuscript body**

58 **Introduction:** Technological and scientific advancements in vascular surgical procedures have significantly shifted  
59 toward endovascular surgery (1). The most notable case is the management of Abdominal Aortic Aneurysms (AAA),  
60 where Endovascular Aneurysm Repair (EVAR) has revolutionized treatment by avoiding aortic clamping, reducing  
61 bleeding rates, shortening lower limb ischemia time, and minimizing changes in cardiac indexes and silent ischemic  
62 events (2,3). These advantages result in lower in-hospital mortality, shorter hospital stays, and faster recovery (4).  
63 Consequently, the use of EVAR for unruptured AAAs increased from 45% in 2004 to 83% in 2015 in the USA (5).  
64 However, not all patients are candidates for EVAR, resulting in the continued use of Abdominal Aortic Aneurysm  
65 Open Repair (AAOR) as the preferred treatment option in such cases (1,4).

66  
67 Performing an AAOR requires effective teamwork and a vascular surgeon with highly specific surgical skills (6).  
68 There is an inversely proportional relationship between the mortality of this procedure and the volume of patients  
69 managed by the institution and the surgeon (7). Interestingly, the mortality rate for AAOR increased from 3.2% to  
70 4.1% between 2005-2009 and 2010-2013 ( $p = 0.008$ )(6).

71  
72 This increase in mortality rates can be partially attributed to the decreasing exposure to open vascular surgery (OVS)  
73 due to several factors, including the adoption of endovascular techniques, reduced working hours, and improved  
74 patient safety protocols (7). Globally, these factors have been noted to hinder the acquisition of technical surgical  
75 skills in OVS through experience-based learning (8). Consequently, the lack of standardized training and competencies  
76 due to inequitable opportunities to assist in OVS could be one of the multiple factors affecting surgical outcomes in  
77 AAOR (8).

78  
79 To address this issue, simulation-based training has emerged as a crucial tool for acquiring surgical technical skills,  
80 positioning itself as essential in training various surgical specialties (9,10). The traditional educational model of "*See*  
81 *one, Do one, Teach one*" is being replaced by "*Do many on a simulator, attain competency, then perform under*  
82 *supervision in the operating room*"(8).

83

84 In OVS, only isolated interventions such as simulations of vascular anastomoses (VA), AAOR, or carotid  
85 endarterectomies have been implemented, showing high efficacy in acquiring technical surgical skills (7,11,12).  
86 However, the evidence primarily consists of heterogeneous observational studies conducted by North American and  
87 European trainees (7). Despite their validity, these methodologies are based on individual learning structures and do  
88 not encompass comprehensive training programs (10). This shows the need for a structured, progressive, simulation-  
89 based program in OVS.

90

91 **Methods/Design:**

92 Aims of the study: The primary objective is to compare the efficacy of a progressive, structured simulation-based  
93 training program versus traditional experience-based training in acquiring technical surgical skills in OVS among  
94 residents in general, vascular, and cardiothoracic surgery.

95

96 Secondary objectives include designing and implementing a micro-curriculum for progressive structured simulation-  
97 based training in OVS; assessing technical surgical skills in OVS before and after the implementation of the structured  
98 training program; analyzing differences in skill acquisition attributed to the varying levels of simulation exposure  
99 among different groups within the program; and evaluating the reaction and satisfaction of residents with the  
100 structured, progressive simulation-based training program in OVS.

101

102 Study setting: The study will be conducted at the advanced simulation center of the Universidad del Rosario in Bogotá,  
103 DC., Colombia. Participants will include residents from any year of general, vascular, and cardiothoracic surgical  
104 programs from various institutions in Bogotá.

105

106 Study design: An experimental, three-arm, randomized, single-blinded clinical trial will be conducted. The SPIRIT  
107 guidelines were followed (**Fig 1 and S1 Appendix**)(13). Due to its educational nature, a control and intervention  
108 phase will be conducted in all three arms (**Figure 2**). This allows all participants to have access to the potential benefits  
109 derived from the intervention.

110

111 **Fig 1.** SPIRIT schedule of enrollment, interventions, and assessments.

112  
113  
114  
115  
116  
117  
118  
119  
120  
121  
122  
123  
124  
125  
126  
127  
128  
129  
130  
131  
132  
133  
134  
135  
136  
137  
138  
139

**Fig 2.** Graphic representation of the methodological design of the study.

In the control phase, participants will continue with experience-based traditional training and will not receive any simulation-based training intervention.

A theoretical module will be provided in the intervention phase to ensure the minimum required knowledge. The simulation-based training program in OVS consists of three courses: specific surgical skills, isolated surgical skills (VA), and a complex surgical procedure (AAOR). Participants will be randomized into 3 groups with different exposure to the simulation-based program. Group I will only receive the AAOR training module. Group II will receive the VA and AAOR training modules. Group III will receive precise motor skills, VA, and AAOR training modules (**Fig 2.**)

Each training module will consist of 2 practical sessions of simulation-based training per participant with a total of 6 hours. The sessions are organized according to the model established by Kopta et al. The first session is cognitive and integrative, where participants will observe an expert vascular surgeon performing the procedures, ask questions, and seek guidance. The remaining sessions will be autonomous (14).

Sample Size Calculation: The minimum number of participants to achieve a significance estimate was made with the formula described by wang et al.  $n = [(Z\alpha/2 + Z\beta)/(d - \delta)]^2 [(p_2(1-p_2)/k + p_1(1-p_1))]$ , where n represents the sample size per group (intervention and control)(15).  $Z\alpha/2 = 1.28$  is the critical z-value for the desired significance level (e.g., for a significance level of 10%).  $Z\beta = 0.8$  is the critical z-value for the desired power (e.g., for a power of 80%).  $\delta = 16\%$  margin of superiority.  $d = p_1 - p_2$  is the difference between the actual response rates of the intervention group. A superiority of 60% against 40% is expected.  $k = 1$ , same size between groups. Subsequently, we substitute into the formula that at least 39 participants (13 per group) would be needed. Additionally, 10% of enrolled participants are expected to drop out due to any circumstances that may arise and, therefore, not be analyzable. Thus, approximately 45 participants (15 per group) are needed.

140 Participant selection: Participants will be selected from residents in general, vascular, and cardiothoracic surgery,  
141 considered related specialties that potentially benefit from the intervention (16,17). Participants must be in good health  
142 and free from conditions that could interfere with study participation. Severe illnesses, known allergies to intervention  
143 components, or medical conditions that hinder study compliance may lead to exclusion. Individuals unable to provide  
144 informed consent due to cognitive or legal incapacity will also be excluded. Additionally, those with prior experience  
145 in structured open vascular surgery simulations will be excluded to avoid bias from pre-existing familiarity.

146  
147 The medical education department at Fundación Cardioinfantil-laCardio will disseminate the study through  
148 institutional emails to partner schools. Additionally, the study will be promoted on social media platforms such as  
149 LinkedIn, Instagram, and X. Potential participants will receive information about the study, its overall design,  
150 objectives, and expected benefits. Emphasis will be placed on the voluntary nature of participation. Only those who  
151 express a willingness to participate will be considered and provided with further information on the next steps. The  
152 process for expressing interest includes: (1) Completing an interest survey; (2) Receiving an email with more  
153 information, including informed consent, confidentiality agreement, and personal data consent form; (3) Responding  
154 to the email to confirm interest and submitting signed documents; and (4) Scheduling for randomization and a pre-  
155 test.

156  
157 Participants will not be excluded under any circumstances based on sex, race, socioeconomic status, sexual orientation,  
158 university offering the residency program, or current level of training in medical residency. The invitation will not be  
159 sent or designed to include the name of a professor or person of authority so that communication is implemented  
160 neutrally and there is no influence from authority figures in the recruitment process. The disclosure process will be  
161 done through the official communication channels of the collaborating institutions involved in this study.

162  
163 Participant retention: When possible, program directors of the enrolled participants will be contacted to help reserve  
164 time frames. A schedule with the required time frames will be sent out from the beginning so that participants can  
165 adjust accordingly. A logistics team will frequently contact the participants to remind them of their session times,  
166 depending on the group they are allocated. “Make-up” days will be available for participants who are unable to attend  
167 a session, allowing them to complete it at an alternative time frame.

168

169 Informed consent: Each participant will be asked to give written informed consent before participating in the study.  
170 Researchers will provide detailed information about the study's objectives, procedures, potential risks, and benefits.  
171 Participation will be emphasized as voluntary, with the freedom to withdraw at any time without negative  
172 consequences (**S2 Appendix**).

173

174 Randomization: Participants will be randomly allocated into one of the three groups using stratified randomization.  
175 Participants will be stratified based on two factors: their residency level (from first to fourth year) and their residency  
176 type (General vs. Vascular or Cardiothoracic surgery). Initially, participants will be categorized into subgroups  
177 according to their year of residency. Within each residency level subgroup, participants will further be divided into  
178 their type of residency. After establishing these strata, participants within each stratum will be randomly assigned to  
179 one of the three study arms. This approach ensures a balanced representation of residency levels and types across all  
180 groups, enhancing the reliability and validity of the trial results.

181

182 The allocation sequence will be implemented using sealed envelopes and the randomization will be conducted in a  
183 single session after all participants have been enrolled. The sequence will be computer-generated using the application  
184 randomization.com. Each participant will receive their assignment through sequentially numbered, opaque, sealed  
185 envelopes, ensuring that the allocation sequence remains concealed until the interventions are assigned.

186

187 Blinding: Evaluators responsible for assessing the efficacy of the different interventions will undergo a single blinding  
188 procedure. These evaluators will be external and independent from the researchers and unaware of the participants'  
189 group assignments. Privacy regarding participants' group assignments will be maintained through coding and  
190 presentation of de-identified data. Data will be presented as a videotape without voices, with glove usage, and image  
191 distortion to prevent the identification of personal details such as gender, race, or other characteristics. Under no  
192 circumstances will the identity of the participants be revealed to the evaluators.

193

194 Simulation models: A 3D printed AAOR simulation model is being developed (**Fig 3 A and B**). We aim to create 3D  
195 printed models from AngioCT images of three patients with unruptured AAA requiring AAOR at our institution.

196 Before using the diagnostic images, patients will be informed of the purpose of the study, ensuring that it does not  
197 affect their medical or surgical treatment. Patients must understand, accept, and sign an informed consent form to use  
198 their images in the creation of 3D models for research use only and anonymize the metadata of the DICOM files.

199  
200 **Fig 3.** Preliminary simulation models. (A-B) AngioCT 3D-printed models of a real-life patient with unruptured AAA  
201 (C) VA models using wooden platforms suspended by clamps at adjustable distances. (D) Specific micro-surgical  
202 skills simulation models will incorporate tools like elongated cherry tomatoes, prolene 6.0, and basic surgical  
203 instruments.

204  
205 The most suitable AngioCT images will be selected based on criteria such as image quality (including slice thickness,  
206 number, and spacing of slices) and the patient's clinical case, focusing on an unruptured AAA. This collaborative  
207 effort involves vascular surgeons and engineers using specialized software, Mimics Innovation Suite 25.0 (Materialise,  
208 Belgium), for medical image processing.

209  
210 Following image selection, the infrarenal abdominal aorta segmentation employs semi-automated threshold-based  
211 methods to isolate the blood volume. A 3D reconstruction is conducted, and the resulting file is exported in STL  
212 format. Subsequently, the aortic wall thickness is determined, set between 1.25 - 2.1 mm, based on the population's  
213 average abdominal aortic wall thickness to ensure a realistic feel for suturing in the 3D printed mode (18,19). It is  
214 assumed that the wall thickness throughout the model will be uniform.

215  
216 The 3D reconstruction model of the abdominal aorta will be divided into three segments: 1) the region of the aneurysm,  
217 2) the region above the aneurysm, and 3) the region below the aneurysm. This division is intended for 3D printing of  
218 the model. Segments 2 and 3 (the regions above and below the aneurysm) will be printed in rigid material, while  
219 segment 1 (the aneurysm region) will be printed in flexible and elastic material. This approach optimizes resources  
220 since the aneurysm region will constantly change during practice. For 3D printing of segment 1 (the aneurysm region),  
221 PolyJet and LCD technology with Agilus30 (Stratasys, Ltd., USA) and flexible UV170TR (Photocentric, UK)  
222 photopolymer resins will be used, respectively, to obtain models with elastic and flexible material to allow suturing.



223 For segments 2 and 3, PolyJet technology with rigid VeroBlue material (Stratasys, Ltd., MN, USA) will be used (**Fig**  
224 **4**).

225

226 **Fig 4.** Graphical representation of the models' selection process, reconstruction, and 3D segmentation.

227

228 VA simulation models will be constructed using wooden platforms suspended by clamps at adjustable distances. This  
229 approach requires minimal material for the VA (**Fig 3C**).

230

231 Specific micro-surgical skills simulation models will require tools facilitating the development of expected  
232 competencies, including elongated cherry tomatoes, prolene 6.0, and basic surgical instruments. (**Fig 3D**).

233

234 Evaluation instruments: A range of tools previously validated for assessing surgical skills in OVS will be utilized.

235 These tools include standardized grading rubrics and will involve external evaluators.

236

237 The OPEn aortic aneurysm Repair Assessment of Technical Expertise (OPERATE) tool, developed and validated by  
238 Nayahangan et al., is a structured assessment instrument designed to ensure competency in AAOR (11,20). The  
239 assessment is divided into distinct domains: patient positioning, incision and exposure, proximal and distal control,  
240 aneurysm sac preparation, graft implantation, and closure. Each domain consists of tasks rated on a numerical scale  
241 (1-3-5), with higher scores indicating better performance. The validation demonstrated that the tool effectively  
242 distinguishes between varying levels of expertise, making it a reliable and robust method for assessing surgical  
243 competence in the AAOR (11).

244

245 The Objective Structured Assessment of Technical Skills (OSATS) tool is widely recognized for evaluating surgical  
246 trainees' technical skills, including those in the vascular surgery (21,22). Each task is rated using a numerical scale  
247 and task-specific checklists, ensuring a comprehensive evaluation. According to Lladó Grove et al., the OSATS tool  
248 includes criteria such as respect for tissue, time and motion efficiency, instrument handling, procedure knowledge,  
249 operation flow, and use of assistants (21). These criteria are rated on a Likert scale, typically 1, 3, or 5, where higher  
250 scores indicate better performance. Sidhu et al. further expanded on the tool's utility by integrating it into a

251 comprehensive vascular skills assessment, demonstrating its effectiveness in distinguishing between different levels  
252 of trainee expertise (22).

253  
254 Also, a flow simulator for anastomosis quality assessment will mimic the rheological characteristics of the abdominal  
255 aorta surgery. Its purpose is to evaluate the quality of vascular anastomosis via an anastomotic leakage test employed  
256 in both introductory surgical and complex surgical procedure courses. This simulator comprises flow measurements,  
257 collection, and pressure measurement devices, ensuring precise hydrostatic pressure measurement ( $\pm 0.3$  kPa). The  
258 saline solution will serve as the medium.

259  
260 Data collection instrument: Data for the study will be collected and securely stored online using the REDCap web  
261 application. Only anonymized data, identified by randomization labels, will be uploaded to the database to ensure  
262 privacy. The primary data sources include participant surveys, external assessors' evaluations, and logistics personnel's  
263 objective data. No secondary data will be collected.

264  
265 Outcomes: Each participant will be the object of observation and measurement for this study. We adhere to Messick's  
266 validation framework (7), so the evaluation scores must correlate with known measures of competence, and pass/fail  
267 grades will be established. The assessment of the intervention's effects will depend on the intervention arranged in  
268 each study phase.

269  
270 For the theoretical module, a traditional evaluation through multiple-choice questions will be used (24). A passing  
271 score of 3.0 out of 5.0 points will be utilized, which means a better outcome. Two theoretical tests will assess the  
272 efficacy of this intervention before and after its application.

273  
274 For the specific micro-surgical skills and isolated surgical skills (VA), the “OSATS tool” will be used (7,21,22). We  
275 adhere to the passing score established by Chipman et al. of 75% of the “minimum required” skill according to each  
276 module (23). A higher score means a better outcome.

277

278 For the complex surgical procedure (AAOR), the “OPERATE tool” will be used (11). We adhere to the established  
279 passing score of 27.7 points. A higher score means a better outcome.

280

281 Standardizing minimum and maximum volumes will also establish thresholds for acceptable leakage levels for the  
282 anastomosis quality with the flow simulator.

283

284 In the control phase, two tests will be conducted to collect data on their performance and technical surgical skills  
285 without the direct influence of the educational intervention. For the intervention phase, the second test of the control  
286 phase will serve as the starting baseline, and a third test will be conducted at the end of the simulation-based surgical  
287 training.

288

289 Before starting each session/test in all phases, structured surveys will be completed to establish self-assessment,  
290 satisfaction, and confounding factors such as exposure to vascular surgical procedures (intervention). A Likert scale  
291 with a minimum value of 1 and a maximum value of 10 will be used. A higher score means a better outcome.

292

293 Data management plan: Data will be managed in compliance with Colombian law 1581 of 2012, ensuring  
294 confidentiality and anonymization. The REDCap platform will secure data, with access restricted to authorized users.  
295 Periodic audits (monthly) will maintain data quality and address discrepancies. Precise and standardized instructions  
296 will be provided to all participants before each course and simulation test, verified during the pilot test. Robust  
297 logistical procedures will manage the pilot test, identifying issues before implementation. Data collection will follow  
298 a standardized methodology, ensuring secure and consistent entry. The research center at Fundación Cardioinfantil –  
299 La Cardio will exclusively protect and store data. Study documents will be archived or stored on institutional servers  
300 for five years post-study, then transferred to long-term storage for up to 15 years before destruction.

301

302 Statistical analysis: Both conventional and Machine Learning methods will be utilized. The analysis will begin with  
303 exploratory data analysis, including calculating descriptive statistics such as mean, median, and standard deviation for  
304 the self-assessment and satisfaction surveys, controlling confounding factors, and characterization of participants.  
305 Correlation analysis (Pearson or Spearman, as appropriate) will be performed to explore relationships between

306 participant characteristics and skill acquisition, retention, and satisfaction. Visualizations, such as histograms and bar  
307 charts, will be created to represent the distribution of these results and frequency analysis will be performed to evaluate  
308 the prevalence of various factors and characteristics within the intervention groups. Anomaly detection techniques  
309 like Isolation Forest or One-Class SVM will be used to detect unusual performance or deviations from expected  
310 outcomes.

311  
312 For the primary objective, a comparative analysis will be conducted between the three randomized groups. A repeated-  
313 measures ANOVA will be used to analyze differences in skill acquisition within and between groups. Post-hoc  
314 pairwise comparisons will be conducted to identify specific group differences. A significance level of  $p < 0.05$  will  
315 be set for all analyses.

316  
317 To assess technical surgical skills in OVS before and after the implementation of the structured training program  
318 paired t-tests will be used to compare pre-and post-intervention skill levels within each group. To analyze differences  
319 in skill acquisition attributed to the varying levels of simulation exposure among different groups within the program  
320 a subgroup analysis will be performed to evaluate the impact of different simulation exposure levels on skill  
321 acquisition, ANCOVA will be used to control for potential confounders such as baseline skill level, year of residency,  
322 and previous surgical experience. To evaluate the reaction and satisfaction of residents with the structured, progressive  
323 simulation-based training program in OVS differences in satisfaction levels between groups will be explored using  
324 Chi-square tests or Kruskal-Wallis tests, depending on data distribution.

325  
326 Additionally, predictive modeling techniques such as regression trees and random forests will be employed to assess  
327 and forecast skill acquisition efficacy based on participants' demographics, prior experience, and exposure to various  
328 training modules. Clustering analysis methods, including k-means clustering and hierarchical clustering, will segment  
329 participants into distinct groups based on their skill acquisition patterns and responses to the training interventions.  
330 This will help identify subgroups that exhibit similar responses to different training approaches. Dimensionality  
331 reduction techniques, such as Principal Component Analysis (PCA) and t-SNE, will simplify the data complexity and  
332 enhance the visualization of relationships between training exposure, skill acquisition, and other variables, thereby  
333 highlighting the key factors contributing to successful skill development.

334  
335 Analysis population and missing data: The analysis population will be based on the intention-to-treat (ITT) principle,  
336 meaning all participants will be included in the analysis according to their original randomization group, regardless  
337 of their retention or adherence to the protocol. This approach aims to maintain the randomization integrity and reflect  
338 real-world effectiveness. Missing data, primarily due to participant dropouts and loss of retention, will be addressed  
339 with a combination of methods. While imputation techniques will be predominantly employed to estimate missing  
340 values, ensuring that the analysis utilizes the maximum amount of available data, a sensitivity analysis will also be  
341 conducted to assess how different methods for handling missing data impact the study results. This comprehensive  
342 approach will help to evaluate the robustness of the findings and mitigate potential biases introduced by incomplete  
343 data.

344  
345 Safety considerations: The primary risk of this study arises from the hierarchical setting, and we recognize the  
346 importance of clarifying this aspect. Although Fundación Cardioinfantil – La Cardio professors will facilitate the  
347 cognitive and integrative simulation sessions, it is crucial to emphasize that independent external evaluators will  
348 conduct performance evaluations in a fully anonymous and standardized manner. This external evaluation will not  
349 affect the participants' performance or status within their respective training programs, ensuring impartiality in the  
350 assessment.

351  
352 Handling surgical instruments during simulation sessions may raise concerns about potential personal injuries. To  
353 minimize this risk, rigorous safety protocols that have been standardized and established by the advanced simulation  
354 center at Universidad del Rosario will be followed. Detailed guidance on the safe handling of instruments will be  
355 provided during the sessions, and expert professionals will ensure constant supervision. Additionally, emergency  
356 measures and procedures are in place to address any unexpected situations and ensure participants' physical safety.

357  
358 Delphi method: Following Messick's framework of validity, a systematic type 2 Delphi method will be used before  
359 starting the clinical trial or pilot test (24). A heterogeneous group of anonymous expert vascular surgeons will evaluate  
360 a standardized questionnaire, adapted for multiple rounds, to select content components for the theoretical and  
361 practical modules. Each round will refine the questionnaire based on expert feedback until consensus is achieved.

362 Consensus will be defined as agreement by 80% of the experts (4:1 ratio), and lack of consensus will be defined as  
363 less than 20% agreement (4:1 ratio). A maximum of three rounds will be conducted (initial round plus two extensions).  
364 It will be eliminated if a question fails to achieve more than 80% agreement. The final round will conclude the Delphi  
365 process if consensus is reached, or a live meeting will be held if needed.

366  
367 Pilot study: Before fully implementing the structured progressive simulation-based open vascular surgery training  
368 program, a pilot test will be conducted with 6 participants to identify and address potential logistical and  
369 methodological issues. Objectives include standardizing simulation parameters, evaluating protocol logistics, and  
370 training external evaluators. The pilot study will follow the same stages as the full protocol but over a shorter period.  
371 Key focus areas include participant selection, randomization, blinding effectiveness, 3D model printing accuracy,  
372 anastomosis quality measurement, theoretical virtual module comprehension, technological support, simulation  
373 training logistics, and data collection on REDCap. This phase aims to ensure the quality and reliability of the entire  
374 study by resolving any identified problems.

375  
376 Status and timeline: Recruitment has yet to begin; we expect to finish recruitment on 31 September 2024. The control  
377 phase will probably begin in October 2024. The intervention phase may run from November 2024 to March 2025.  
378 The analysis and scientific writing may span from March to June 2025.

379  
380 Trial registration: This study protocol was registered with the NCT-ID: NCT06452901 on [www.ClinicalTrials.gov](http://www.ClinicalTrials.gov)  
381 using the account of the research center at Fundación Cardioinfantil – laCardio.

382  
383 Data availability: Due to participants' privacy and Colombian law concerns, the data will not be available for public  
384 access but may be available from the corresponding author upon reasonable request.

385  
386 **Discussion:**  
387 Vascular surgery has become a highly complex specialty requiring more competent surgeons (3–5). Despite this,  
388 current surgical training programs are often criticized for their limited ability to impart technical skills in open vascular  
389 surgery, mainly due to varying clinical case exposures for each trainee (7). Simulation strategies have proven effective

390 in enhancing surgery's technical and theoretical learning curve, especially in the early stages of training (16,17).  
391 However, existing evidence on simulation-based programs for OVS is mainly limited to non-experimental,  
392 heterogeneous observational studies conducted with North American and European trainees (7).

393  
394 Implementing a micro-curriculum for a progressively structured simulation-based training program in OVS can  
395 promote the acquisition of critical surgical competencies in future vascular surgeons. Additionally, it seeks to  
396 standardize the learning process for surgical skills in OVS, establishing quality benchmarks for surgical programs  
397 involving these procedures. In the medium to long term, this methodology could encourage adopting and adapting this  
398 strategy in medical centers and universities, both nationally and internationally, within their surgical training curricula.  
399 This standardization ensures that all trainees receive a consistent and high-quality educational experience, regardless  
400 of their training location or exposure to OVS (7).

401  
402 Developing reusable simulation models for AAOR represents a significant innovation in applying 3D printing  
403 technology in vascular surgery. Traditionally, 3D printing has been primarily used for planning and training in  
404 endovascular techniques (25). However, our study may demonstrate that this technology can also significantly enhance  
405 training in OVS. By creating accurate and reusable simulation models, we can provide an efficient tool for AAOR  
406 training, offering a precise and personalized representation of patient anatomy and facilitating the planning and  
407 execution of AAOR procedures.

408  
409 Our study's sequential structure aligns with Kirkpatrick's levels 1 and 2 of training evaluation efficacy, focusing on  
410 immediate learner reactions and the extent of learning (7). This approach is crucial for assessing the immediate impact  
411 of the training program on the participant's skills and knowledge. Moreover, it provides a basis for future studies to  
412 evaluate the transfer of skills to the operating room (Kirkpatrick level 3) and subsequent surgical outcomes in patients  
413 (Kirkpatrick level 4) (7). By enhancing surgical skills through a structured simulation-based program, we anticipate  
414 improved surgical outcomes, reduced complications, and enhanced patient safety.

415  
416 The three-arm design of this study ensures that all participants have access to the potential benefits derived from the  
417 intervention, thereby maximizing the educational value for each participant. This approach is particularly

418 advantageous as it aligns with current evidence supporting the benefits of medical simulation in the training process  
419 of surgical residents (16,17). This structure provides a robust framework for evaluating the differential impacts of the  
420 intervention but also ensures that every participant is provided with potentially valuable training opportunities.

421  
422 Also, following the Messick validation framework is critical in ensuring the robustness and credibility of simulation-  
423 based training programs, particularly in the context of OVS (7). According to Lawaetz et al., this framework provides  
424 a comprehensive approach to validating educational interventions (7). By adhering to it, our study aims to ensure that  
425 OVS's structured, progressive simulation-based training program is rigorously evaluated for its efficacy, fairness, and  
426 applicability. This approach enhances the reliability of the findings and supports the standardization of surgical  
427 training.

428  
429 Given the design and nature of this study, multiple biases may arise, necessitating effective identification and control  
430 strategies. Learning bias is a significant concern, with participants potentially experiencing period effects caused by  
431 changes in participants' conditions, such as varying exposure to surgical practices or self-learning, which will be  
432 controlled through pre-session surveys to identify confounding factors and ensure adequate randomization among the  
433 intervention groups. Sequence effects, influenced by the order of study periods, will be managed by adopting a logical  
434 phase based on the difficulty of "unlearning" acquired knowledge, thus providing a natural progression for the learning  
435 process.

436  
437 Integrating cognitive and technical lessons through a blended learning methodology is essential in modern surgical  
438 education. Jayakumar et al. highlight the significant benefits of e-learning in surgical education, noting that it allows  
439 for flexible, self-paced learning while providing access to a wide range of resources and interactive content (26).  
440 Additionally, Malas et al. emphasize the importance of visualization in simulation training for VA (14). Their findings  
441 indicate that visual learning aids, such as detailed anatomical models and procedural simulations, significantly  
442 improve trainees' technical skills. Combining cognitive lessons delivered through blended learning with hands-on  
443 technical training in a simulated environment creates a comprehensive educational experience that enhances  
444 understanding and practical proficiency.

445



446 Selection bias, which may occur if participant assignment to groups is not genuinely random, will be mitigated by  
447 stratified randomization by ensuring that key variables, such as baseline characteristics or covariates, are evenly  
448 distributed across different treatment groups. Consistent application of inclusion and exclusion criteria throughout the  
449 study will further reduce this bias. The selection of participants within these specialties is crucial to ensure that the  
450 study subjects have sufficient medical knowledge and skills to evaluate the efficacy of the proposed educational  
451 interventions (27). Additionally, including residents from all years of training helps to further reduce selection bias by  
452 ensuring a diverse range of experience levels, which can enhance the generalizability of the findings. Importantly,  
453 each participant will serve as their control, thus minimizing the potential for confounding factors and ensuring that  
454 individual variations in baseline knowledge and skills do not affect the overall outcomes.

455  
456 The data audit team will minimize labeling bias, which results from systematic errors in participant classification, by  
457 carefully reviewing and verifying labels. Attrition bias, which arises if dropouts differ systematically from remaining  
458 participants, will be addressed by calculating additional sample size to ensure sufficient participant numbers at the  
459 study's conclusion. Measurement bias will be controlled using blinded evaluators and standardized evaluation  
460 instruments, with thorough training provided to ensure consistency and accuracy.

461  
462 Despite the meticulous design, several limitations must be considered when interpreting the results. One significant  
463 limitation is the inability to blind researchers and participants who conduct and supervise the simulation courses,  
464 potentially introducing unconscious biases. The sequential and educational nature of the study presents a confounding  
465 variable, as it is impossible to "unlearn" previously acquired knowledge. Additionally, the study is designed to measure  
466 short-term learning impacts (Kirkpatrick levels 1 and 2) but does not assess longer-term outcomes (Kirkpatrick levels  
467 3 and 4), which involve patient interactions and follow-up assessments (7). Financial considerations also pose a  
468 limitation, as acquiring high-quality simulators and implementing courses can incur substantial costs, potentially  
469 affecting the program's scalability in budget-constrained settings. Various funding avenues and cost-reduction  
470 strategies are proposed to address these challenges. However, the protocol has been designed to address these concerns  
471 effectively, ensuring the validity and reliability of the findings.

472

473 We are committed to registering and publishing this study protocol as an essential practice that promotes transparency,  
474 reproducibility, and control of publication bias. This practice ensures that studies with significant and non-significant  
475 results are acknowledged, providing a comprehensive and unbiased view of the evidence. Furthermore, accessible  
476 registration facilitates detailed methodological information sharing, essential for peer review, replication, and meta-  
477 analyses. This openness promotes collaboration, prevents unnecessary duplication, and enhances trust in future  
478 publications in indexed journals and presentations at medical conferences of our work (28).

479  
480 **List of abbreviations:** AAA: Abdominal Aortic Aneurysms, EVAR: Endovascular Aneurysm Repair, AAOR:  
481 Abdominal Aortic Aneurysms Open Repair, OVS: Open Vascular Surgery, VA: Vascular Anastomoses, OPERATE:  
482 OPEn aortic aneurysm Repair Assessment of Technical Expertise, OSATS: Objective Structured Assessment of  
483 Technical Skills.

484

485 **Declarations:**

486 **Version identifier:** Version 4.0, emission date 14/08/2024.

487 **Ethics approval and consent to participate:** This study will be conducted under ethical norms and adhere to  
488 Resolution 8430 of 1993 of the Ministry of Health of the Republic of Colombia and Law 1581 of 2012 regarding data  
489 protection. It was classified as minimum-risk research. The Institutional Clinical Research Ethical Committee of  
490 Fundación Cardioinfantil-La Cardio approved this study protocol (Ref Number: 047-2023). Informed consent will be  
491 obtained from all participants enrolled in the study (CEIC-0530-2026).

492 **Competing interests:** The authors declare that they have no affiliations with or involvement in any organization or  
493 entity with any financial interest in the subject matter or materials discussed in this manuscript.

494 **Funding:** This research received no specific grant from any funding agency, commercial, or not-for-profit sectors.

495 **Presentation information:** A preliminary version of this protocol was presented at the 2024 Scientific Sessions  
496 Vascular Discovery: From Genes to Medicine of the American Heart Association (AHA) poster session and was  
497 awarded the Paul Dudley White International Award.

498 **Authors' contributions:** AVS, JCM, COM, JGBC, and SGG conceived the idea. AVS, CAPS, JVAM, SUR, and JTP  
499 wrote the manuscript. AVS, MMPJR, CJPR, COM, and PACR planned the methodology. DLCR and COM planned  
500 the methodological analysis. YFBM, CEPC, and JCB designed the simulators. AVS, JAVM, ECB, MMPJR, SGG,

501 JCM, and JGBC planned the program content. SGG, JCM, JGBC, JCB, MMPJR, YFBM, and COM critically revised  
502 the manuscript. All authors read and approved the manuscript. We adhere to the authorship criteria of the International  
503 Committee of Medical Journal Editors (ICMJE).

504

505 **Acknowledgments:** We would like to acknowledge the help and work from César Camilo Medina Suárez MD, Julian  
506 M. Corso-Ramírez MD., Euzcady Rafael López Martínez MD., María A. Rodríguez-Soto MSc, PhD., Javier Navarro  
507 Rueda MSc, PhD., Camila Irene Castro Páez MSc, PhD.

508

509 **References:**

- 510 1. Calvín Alvarez P, Botas Velasco M, Del Canto Peruyera P, Vaquero Lorenzo F, Vallina Victorero MJ, Alvarez  
511 Fernández LJ. Coste del tratamiento del aneurisma de aorta abdominal: cirugía abierta frente a tratamiento  
512 endovascular. *Angiología*. 2016 Jan;68(1):20–5.
- 513 2. Cuypers PWM, Gardien M, Buth J, Peels CH, Charbon JA, Hop WCJ. Randomized study comparing cardiac  
514 response in endovascular and open abdominal aortic aneurysm repair. *British Journal of Surgery*. 2002 Nov  
515 29;88(8):1059–65.
- 516 3. Diender E, Vermeulen JJM, Pisters R, Van Schaik PM, Reijnen MMPJ, Holewijn S. Major adverse cardiac  
517 events after elective infrarenal endovascular aortic aneurysm repair. *Journal of Vascular Surgery*. 2022  
518 Dec;76(6):1527-1536.e3.
- 519 4. Chaikof EL, Dalman RL, Eskandari MK, Jackson BM, Lee WA, Mansour MA, et al. The Society for Vascular  
520 Surgery practice guidelines on the care of patients with an abdominal aortic aneurysm. *Journal of Vascular  
521 Surgery*. 2018 Jan;67(1):2-77.e2.
- 522 5. Dansey KD, Varkevisser RRB, Swerdlow NJ, Li C, De Guerre LEVM, Liang P, et al. Epidemiology of  
523 endovascular and open repair for abdominal aortic aneurysms in the United States from 2004 to 2015 and  
524 implications for screening. *Journal of Vascular Surgery*. 2021 Aug;74(2):414–24.
- 525 6. Budtz-Lilly J, Venermo M, Debus S, Behrendt CA, Altreuther M, Beiles B, et al. Editor’s Choice – Assessment  
526 of International Outcomes of Intact Abdominal Aortic Aneurysm Repair over 9 Years. *European Journal of  
527 Vascular and Endovascular Surgery*. 2017 Jul;54(1):13–20.
- 528 7. Lawaetz J, Skovbo Kristensen JS, Nayahangan LJ, Van Herzeele I, Konge L, Eiberg JP. Simulation Based  
529 Training and Assessment in Open Vascular Surgery: A Systematic Review. *European Journal of Vascular and  
530 Endovascular Surgery*. 2021 Mar;61(3):502–9.
- 531 8. Bath J, Lawrence P. Why we need open simulation to train surgeons in an era of work-hour restrictions.  
532 *Vascular*. 2011 Aug;19(4):175–7.
- 533 9. Bath J, Lawrence P, Chandra A, O’Connell J, Uijtdehaage S, Jimenez JC, et al. Standardization is superior to  
534 traditional methods of teaching open vascular simulation. *Journal of Vascular Surgery*. 2011 Jan;53(1):229-  
535 235.e2.

- 536 10. Robinson WP, Doucet DR, Simons JP, Wyman A, Aiello FA, Arous E, et al. An intensive vascular surgical  
537 skills and simulation course for vascular trainees improves procedural knowledge and self-rated procedural  
538 competence. *Journal of Vascular Surgery*. 2017 Mar;65(3):907-915.e3.
- 539 11. Nayahangan LJ, Lawaetz J, Strøm M, De La Motte L, Rørdam P, Gottschalksen BC, et al. Ensuring  
540 Competency in Open Aortic Aneurysm Repair – Development and Validation of a New Assessment Tool.  
541 *European Journal of Vascular and Endovascular Surgery*. 2020 May;59(5):767–74.
- 542 12. Schwartz S, De Virgilio M, Chisum P, Heslin A, Zein A, McDermott M, et al. A Prospective Randomized  
543 Study Assessing Optimal Method for Teaching Vascular Anastomoses. *Annals of Vascular Surgery*. 2014  
544 Jul;28(5):1087–93.
- 545 13. Chan AW, Tetzlaff JM, Altman DG, Laupacis A, Gøtzsche PC, Krleža-Jerić K, et al. SPIRIT 2013 Statement:  
546 Defining Standard Protocol Items for Clinical Trials. *Ann Intern Med*. 2013 Feb 5;158(3):200.
- 547 14. Malas T, Al-Atassi T, Brandys T, Naik V, Lapierre H, Lam BK. Impact of visualization on simulation training  
548 for vascular anastomosis. *The Journal of Thoracic and Cardiovascular Surgery*. 2018 Apr;155(4):1686-1693.e5.
- 549 15. Wang X, Ji X. Sample Size Estimation in Clinical Research. *Chest*. 2020 Jul;158(1):S12–20.
- 550 16. Tanious A, Wooster M, Jung A, Nelson PR, Armstrong PA, Shames ML. Open abdominal surgical training  
551 differences experienced by integrated vascular and general surgery residents. *Journal of Vascular Surgery*. 2017  
552 Oct;66(4):1280–4.
- 553 17. Gillan E, Feghali A, Nguyen T, Salvatore D, DiMuzio P, Abai B. Update of Operative Log Data for Traditional  
554 versus Integrated Vascular Training Programs. *Annals of Vascular Surgery*. 2020 Aug;67:497–502.
- 555 18. Wazzan M, Abduljabbar A, Ajlan A, Ahmad R, Alhazmi T, Eskandar A, et al. Reference Normal Diameters of  
556 the Abdominal Aorta and Common Iliac Arteries in the Saudi Population. *Cureus [Internet]*. 2022 Oct 26 [cited  
557 2024 Jul 16]; Available from: [https://www.cureus.com/articles/117325-reference-normal-diameters-of-the-  
558 abdominal-aorta-and-common-iliac-arteries-in-the-saudi-population](https://www.cureus.com/articles/117325-reference-normal-diameters-of-the-abdominal-aorta-and-common-iliac-arteries-in-the-saudi-population)
- 559 19. Gasser TC. Biomechanical Rupture Risk Assessment: A Consistent and Objective Decision-Making Tool for  
560 Abdominal Aortic Aneurysm Patients. *Aorta*. 2016 Apr;04(02):42–60.
- 561 20. Nayahangan LJ, Konge L, Schroeder TV, Paltved C, Lindorff-Larsen KG, Nielsen BU, et al. A National Needs  
562 Assessment to Identify Technical Procedures in Vascular Surgery for Simulation Based Training. *European  
563 Journal of Vascular and Endovascular Surgery*. 2017 Apr;53(4):591–9.
- 564 21. Lladó Grove G, Langager Høgh A, Nielsen J, Sandermann J. The use of the “Objective Structured Assessment  
565 of Technical Skills” as an Assessment Tool Among Danish Vascular Surgeons in Training. *Journal of Surgical  
566 Education*. 2015 Sep;72(5):1052–6.
- 567 22. Sidhu RS, Chen J, Baxter K, Wu H. Development of a comprehensive vascular skills assessment for surgical  
568 trainees. *The American Journal of Surgery*. 2009 May;197(5):591–4.
- 569 23. Chipman JG, Schmitz CC. Using Objective Structured Assessment of Technical Skills to Evaluate a Basic  
570 Skills Simulation Curriculum for First-Year Surgical Residents. *Journal of the American College of Surgeons*.  
571 2009 Sep;209(3):364-370e2.
- 572 24. Niederberger M, Spranger J. Delphi Technique in Health Sciences: A Map. *Front Public Health*. 2020 Sep  
573 22;8:457.
- 574 25. Maertens H, Aggarwal R, Moreels N, Vermassen F, Van Herzeele I. A Proficiency Based Stepwise  
575 Endovascular Curricular Training (PROSPECT) Program Enhances Operative Performance in Real Life: A

- 576 Randomised Controlled Trial. *European Journal of Vascular and Endovascular Surgery*. 2017 Sep;54(3):387–  
577 96.
- 578 26. Jayakumar N, Brunckhorst O, Dasgupta P, Khan MS, Ahmed K. e-Learning in Surgical Education: A  
579 Systematic Review. *Journal of Surgical Education*. 2015 Nov;72(6):1145–57.
- 580 27. Greenwood V, Shames B, Tanius A, Shames ML, Indes JE. Trends in open abdominal exposure among  
581 vascular surgery trainees. *Journal of Vascular Surgery*. 2017 Sep;66(3):947-951.e2.
- 582 28. Chan AW, Hróbjartsson A. Promoting public access to clinical trial protocols: challenges and  
583 recommendations. *Trials*. 2018 Dec;19(1):116.
- 584



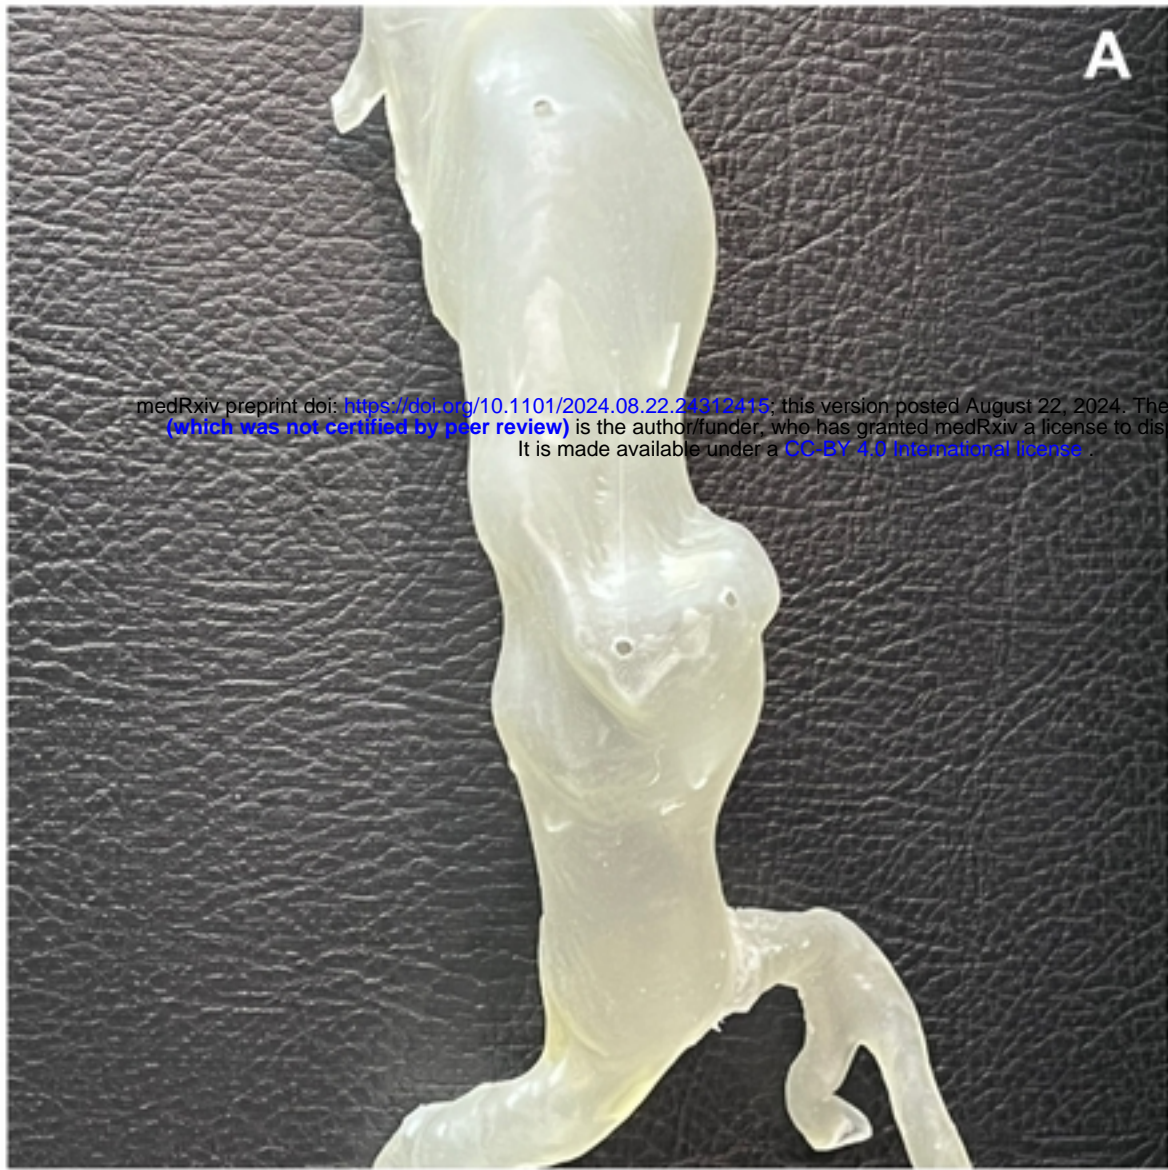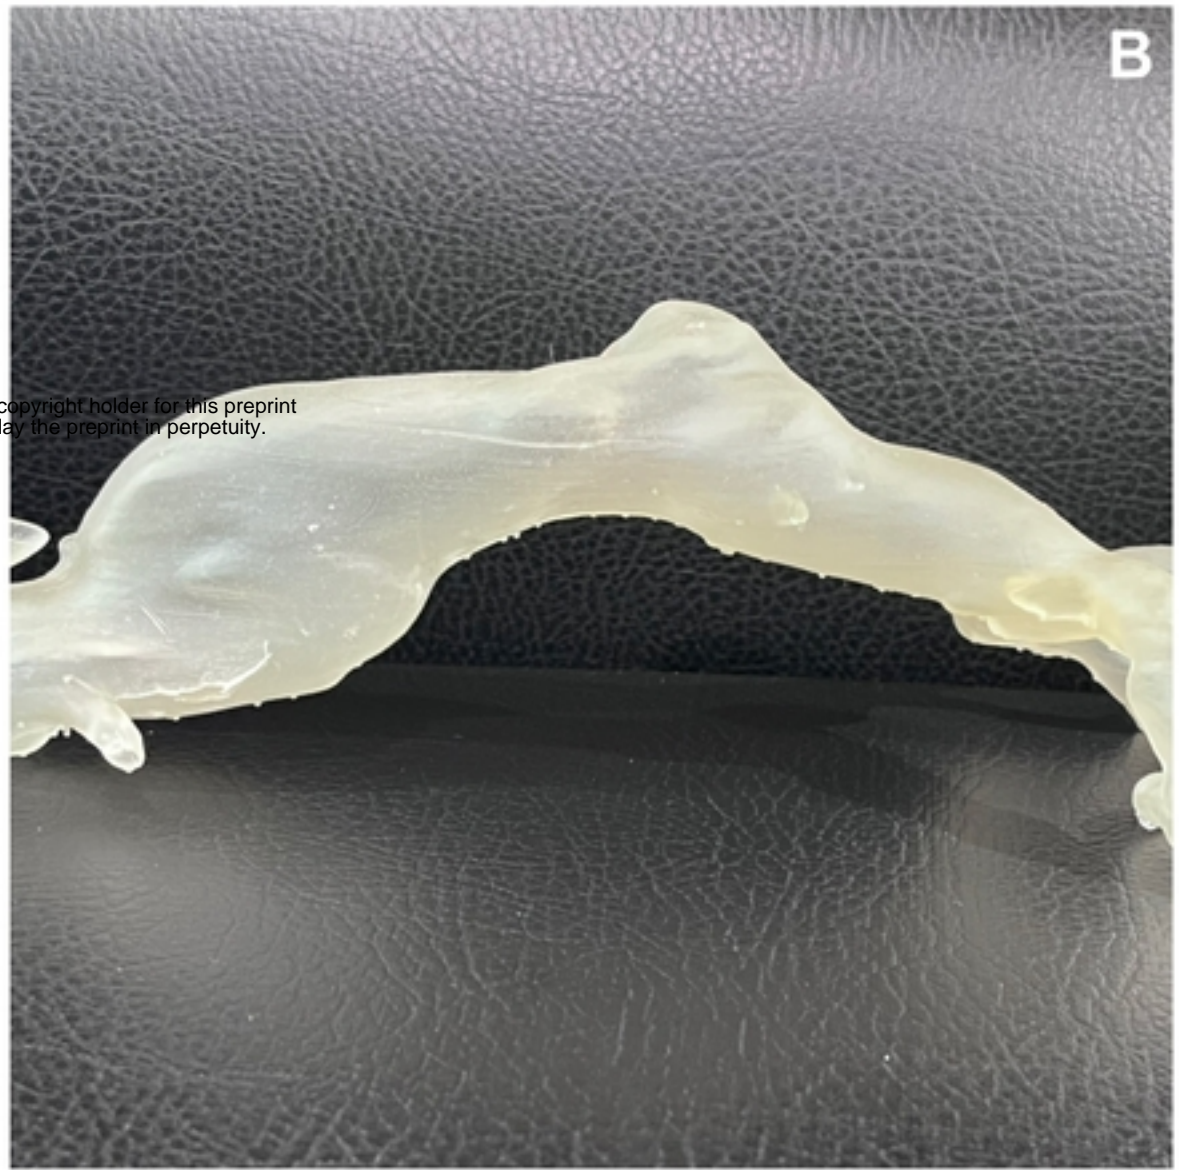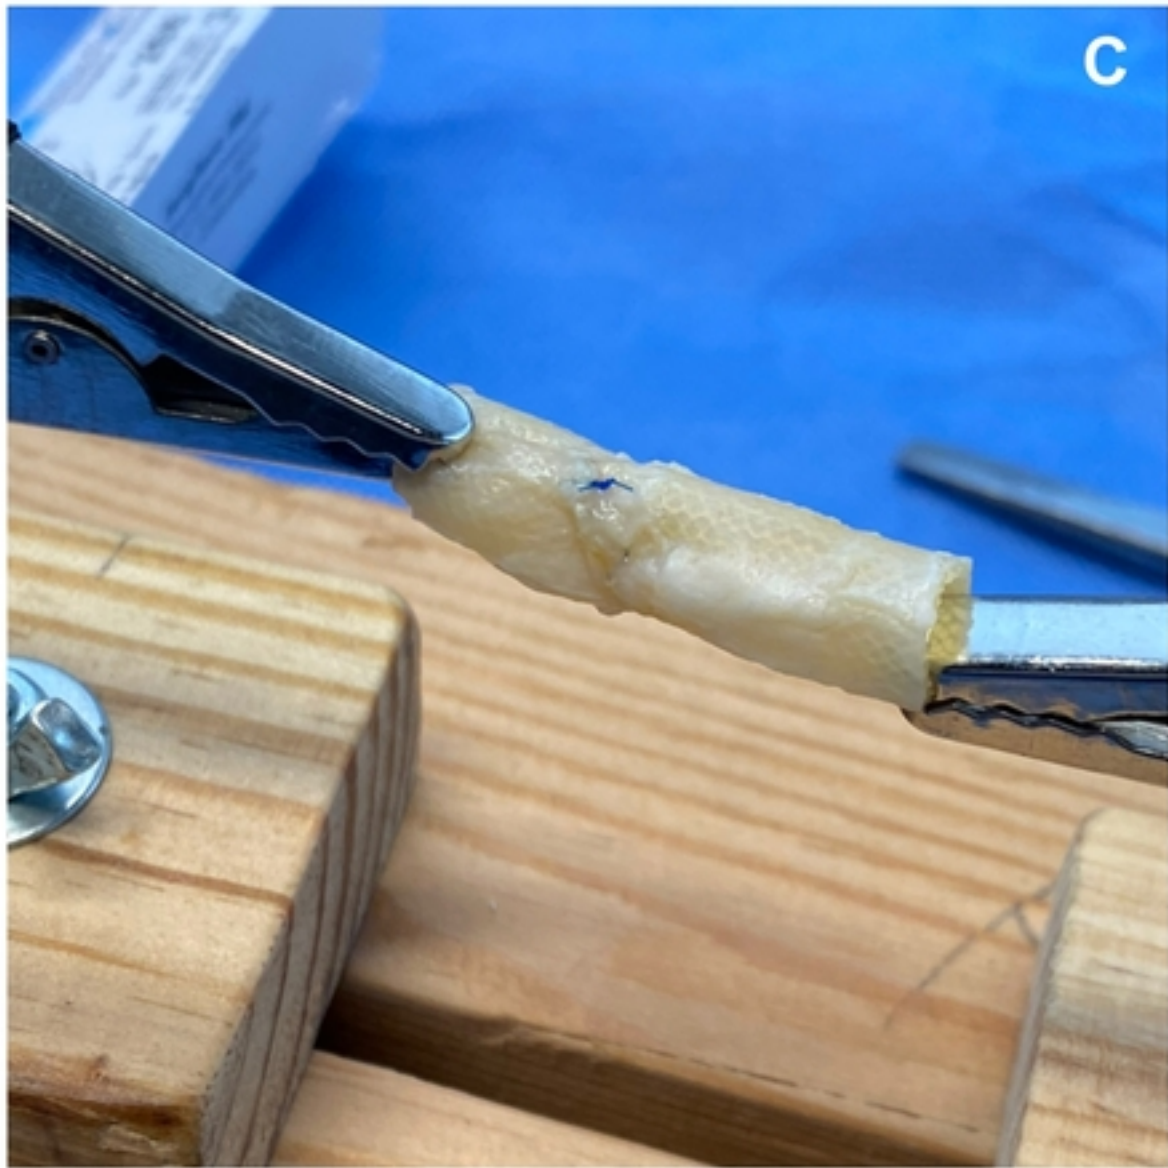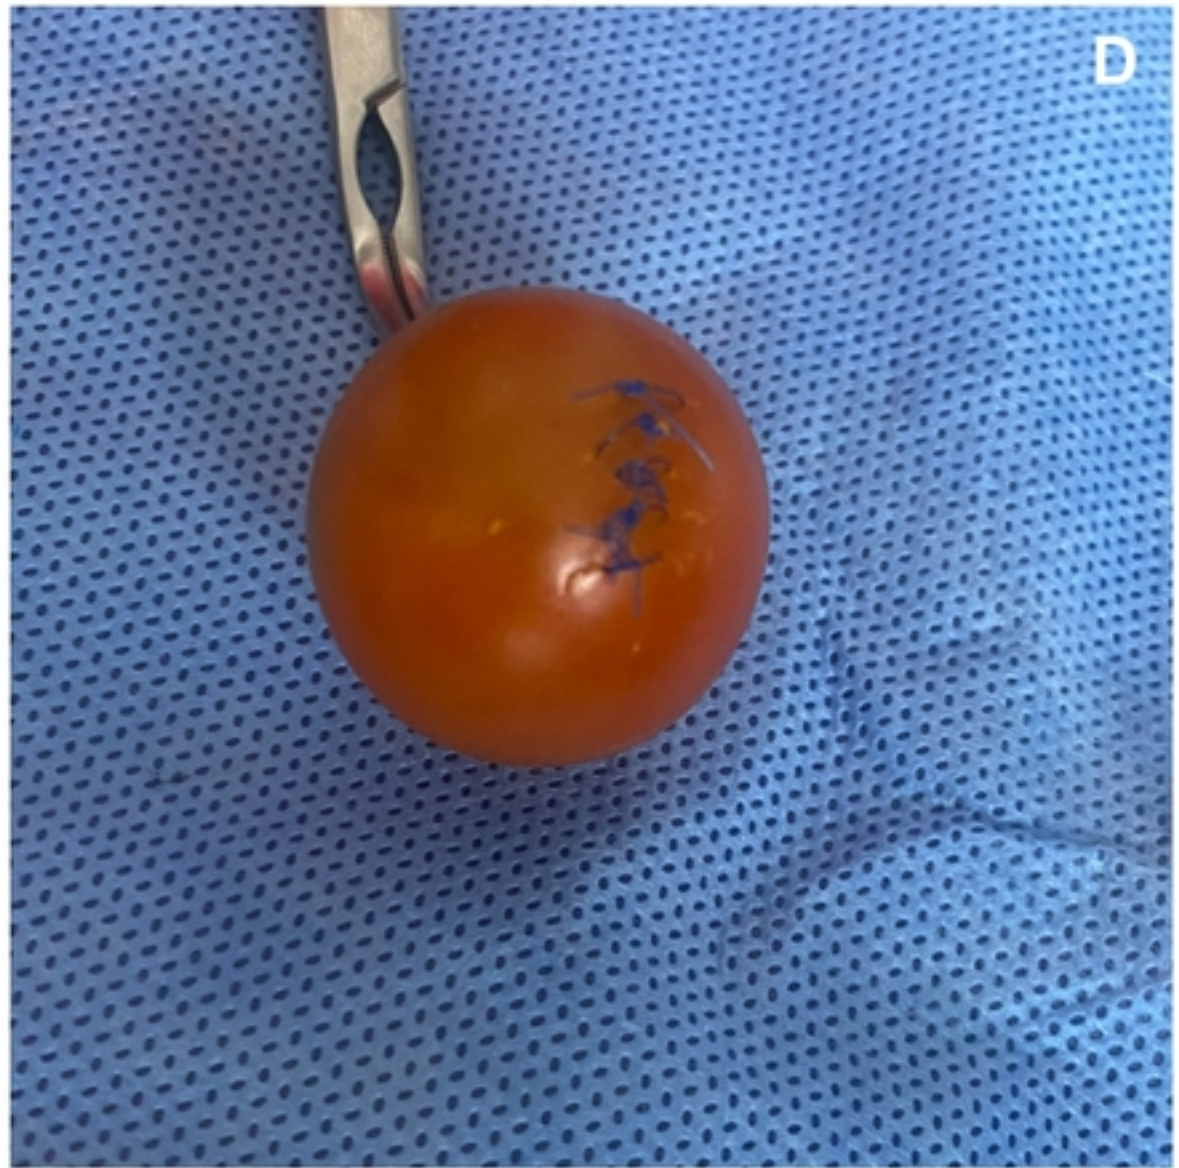

medRxiv preprint doi: <https://doi.org/10.1101/2024.08.22.24312415>; this version posted August 22, 2024. The copyright holder for this preprint (which was not certified by peer review) is the author/funder, who has granted medRxiv a license to display the preprint in perpetuity. It is made available under a [CC-BY 4.0 International license](https://creativecommons.org/licenses/by/4.0/).

Figure 3



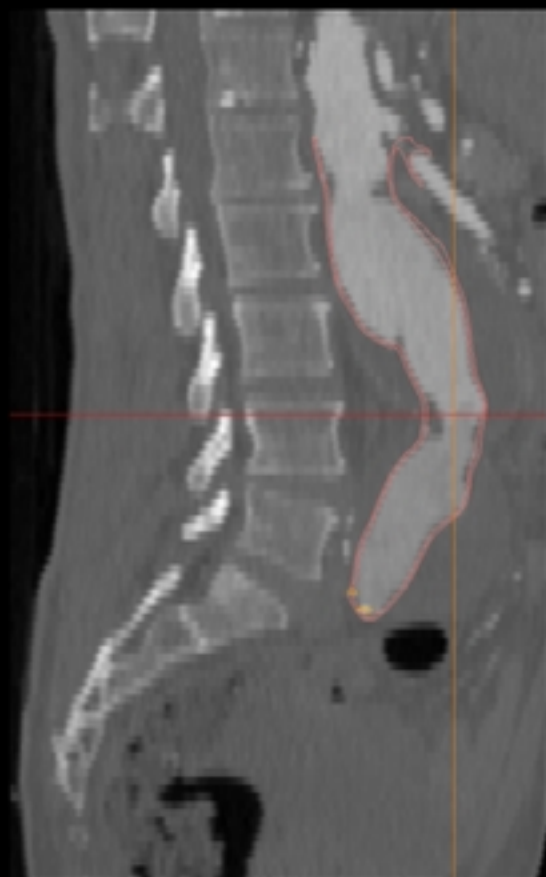

Segmentation in  
AngioCT images

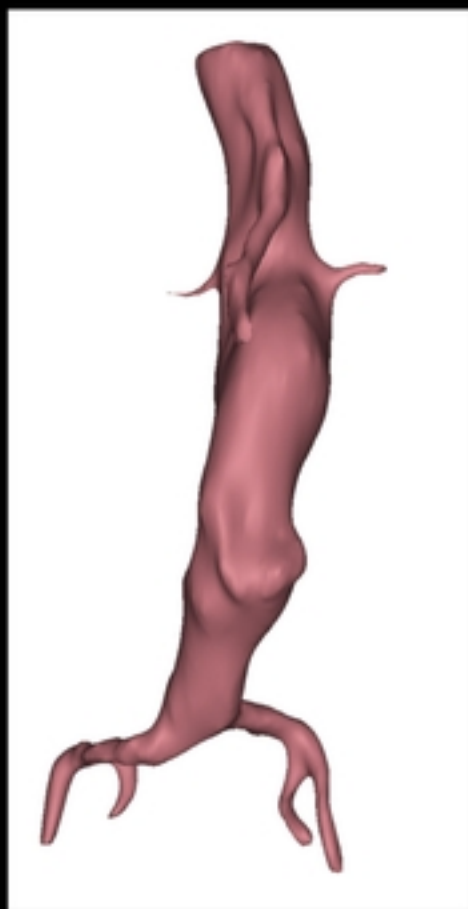

3D reconstruction of  
blood volume

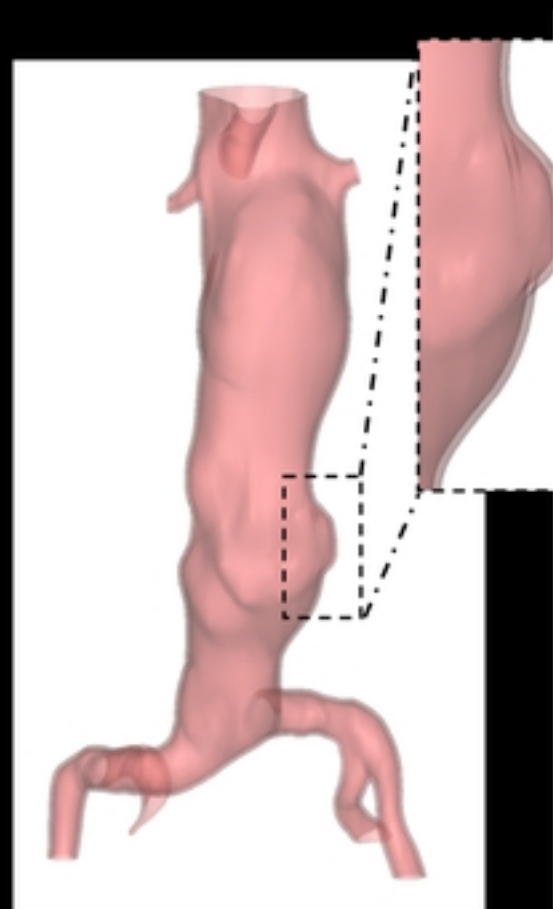

Hollowed model with  
determined wall  
thickness

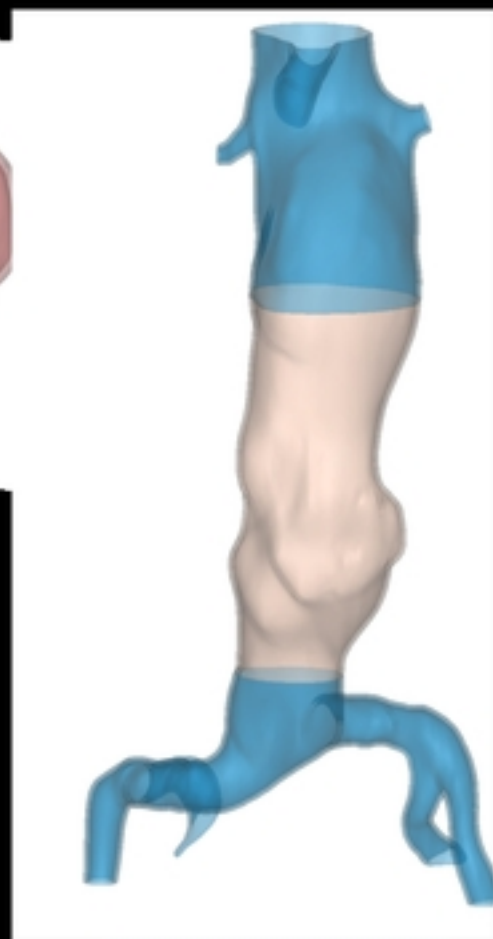

Three 3D printing  
segments

Figure 4

| TIMEPOINT (months)                | Study Period |            |                |     |    | Close-out |
|-----------------------------------|--------------|------------|----------------|-----|----|-----------|
|                                   | Enrollment   | Allocation | Postallocation |     |    |           |
|                                   | -t1          | 0          | t1             | t2  | t3 |           |
| <b>ENROLLMENT:</b>                |              |            |                |     |    |           |
| 3D-Simulation Models Printing     | X            |            |                |     |    |           |
| Theoretical module design         | X            |            |                |     |    |           |
| Selection of participants         | X            |            |                |     |    |           |
| Informed Consent                  | X            |            |                |     |    |           |
| Randomization                     | X            |            |                |     |    |           |
| Allocation                        |              | X          |                |     |    |           |
| <b>INTERVENTIONS:</b>             |              |            |                |     |    |           |
| Control sequence                  |              |            | ◀—▶            |     |    |           |
| Theoretical module                |              |            |                | X   |    |           |
| AAOR module                       |              |            |                | ◀—▶ |    |           |
| VA and AAOR modules               |              |            |                | ◀—▶ |    |           |
| Precise motor skills, VA and AAOR |              |            |                | ◀—▶ |    |           |
| <b>ASSESSMENTS:</b>               |              |            |                |     |    |           |
| Expert's Delphi Method            | X            |            |                |     |    |           |
| Inclusion & exclusion criteria    | X            | X          |                |     |    |           |
| Theoretical test score            |              |            |                | X   |    |           |
| OSATS tool score                  |              |            | ◀—▶            |     |    |           |
| OPERATE tool score                |              |            | ◀—▶            |     |    |           |
| Participant self-assessment       |              |            | ◀—▶            |     |    | ▶         |
| Participant satisfaction          |              |            | ◀—▶            |     |    | ▶         |

Figure 1



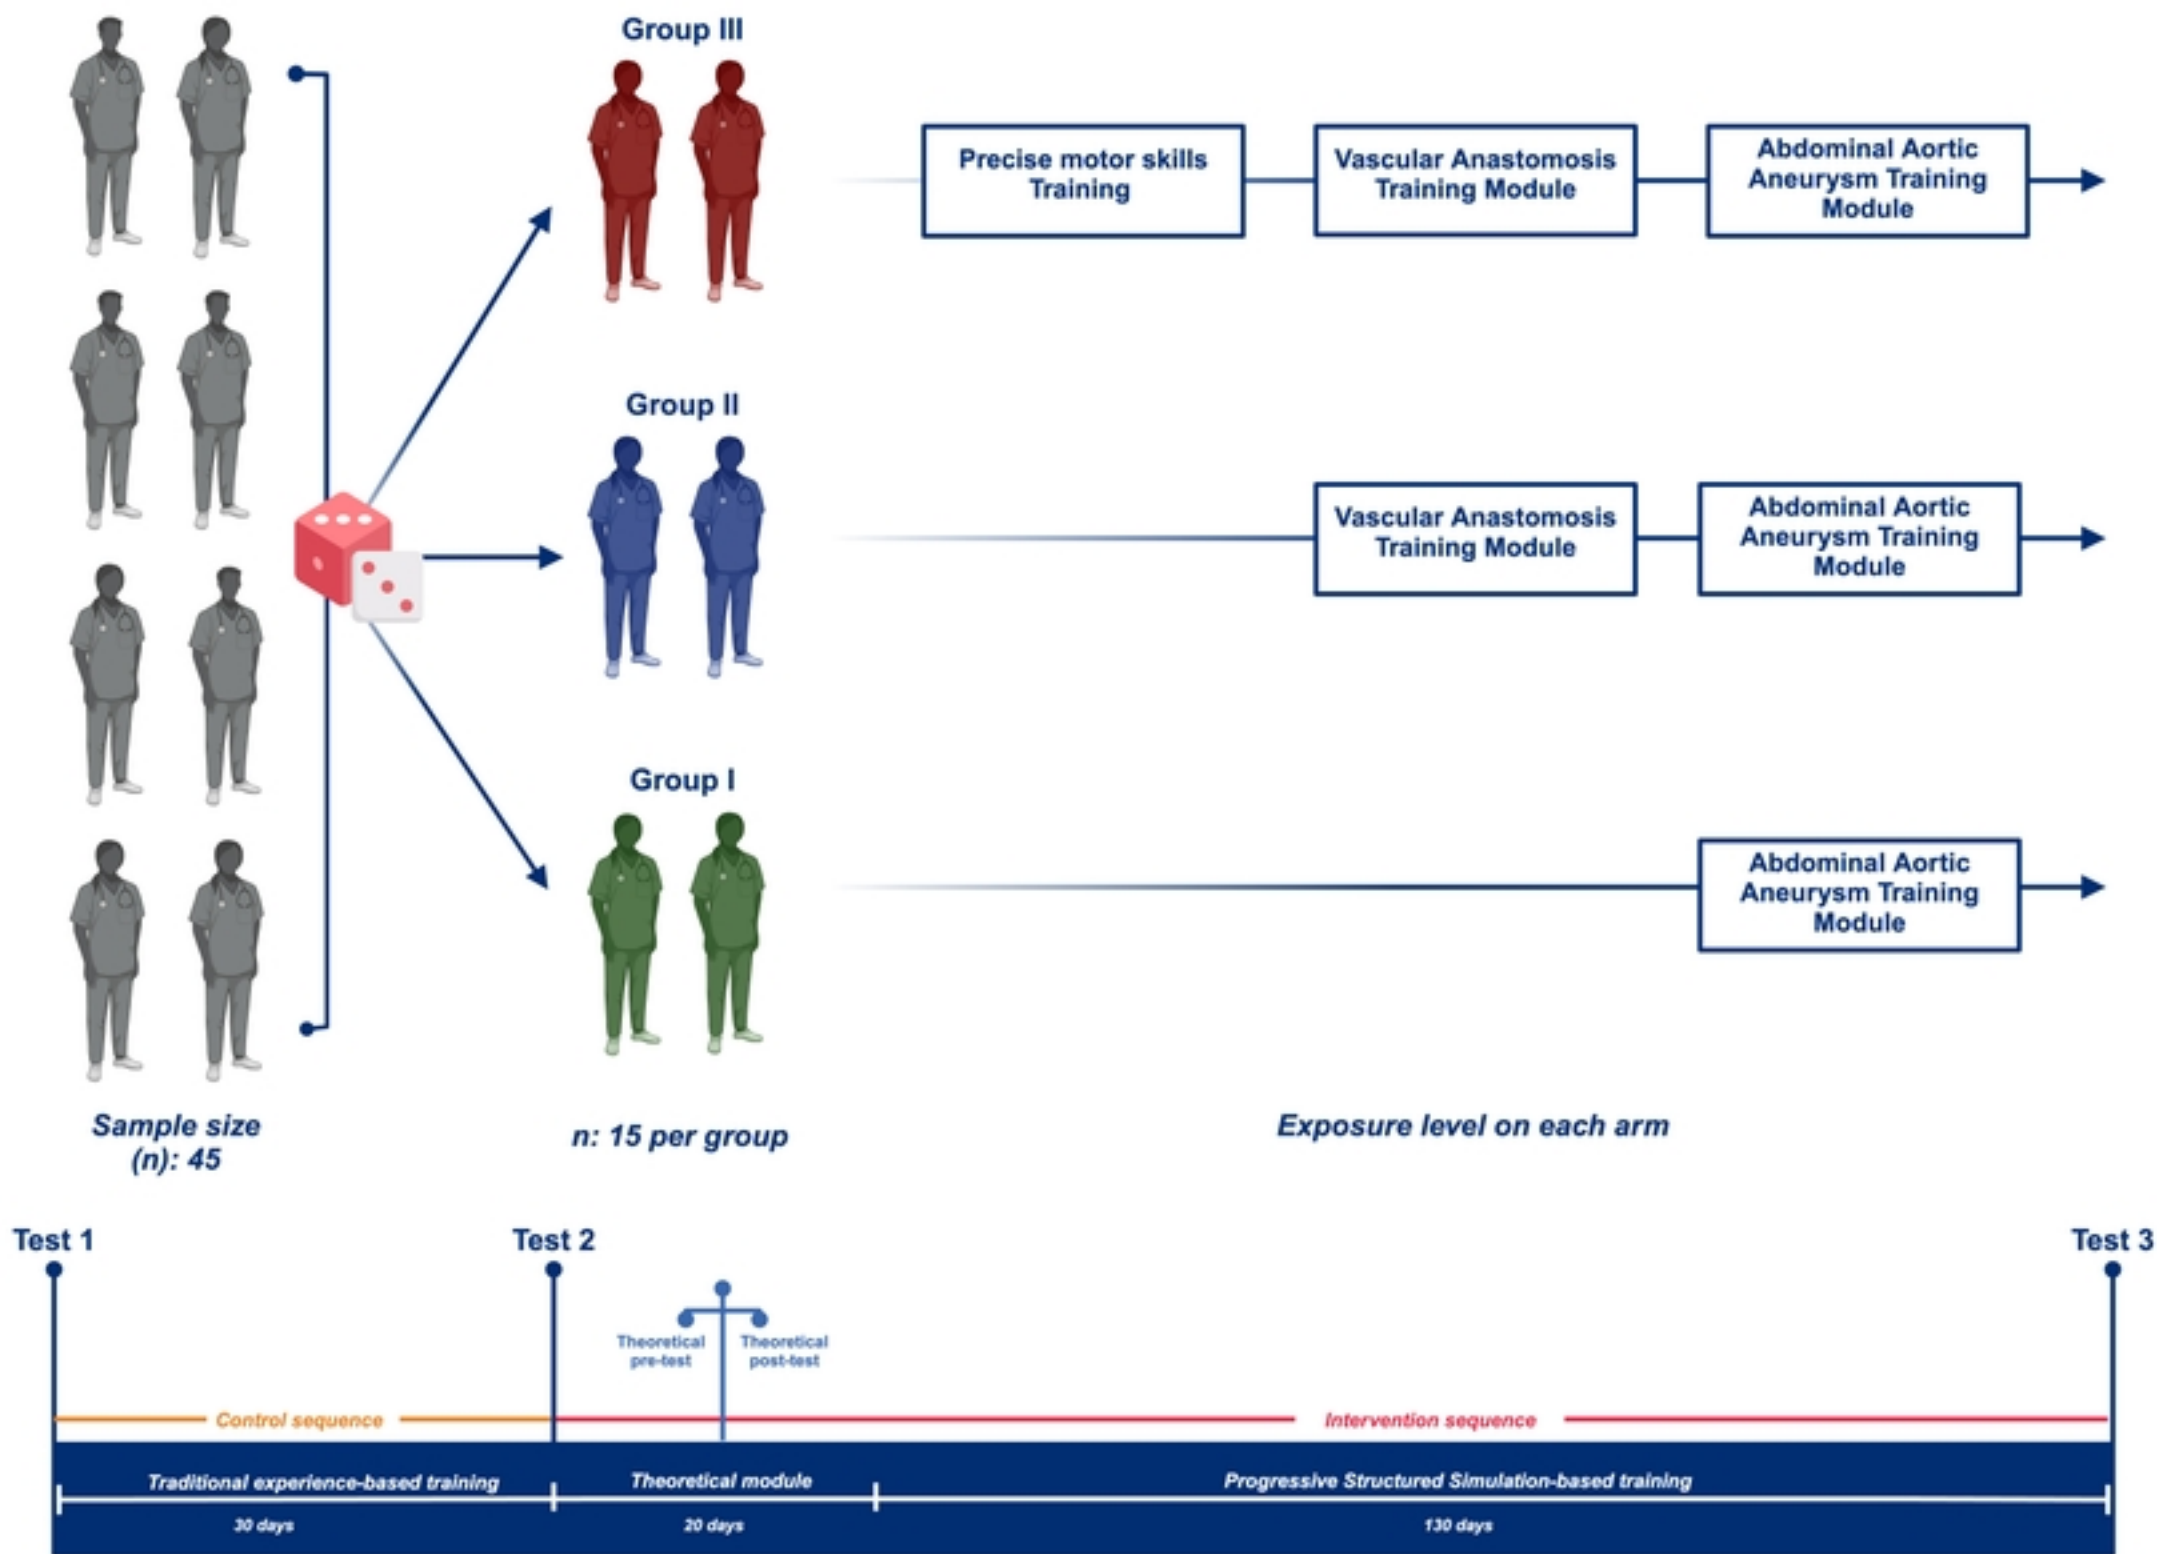

Figure 2
